# Supplementary material for: Extended visible to near-infrared harvesting of earth-abundant FeS2–TiO2 heterostructures for highly active photocatalytic hydrogen evolution
Source: Royal Society of Chemistry journal article supplement (doi:10.1039/c7gc03173d), 2018-01-01
Supplement: c7gc03173d1.pdf [file c7gc03173d1.pdf]

## Supporting Information

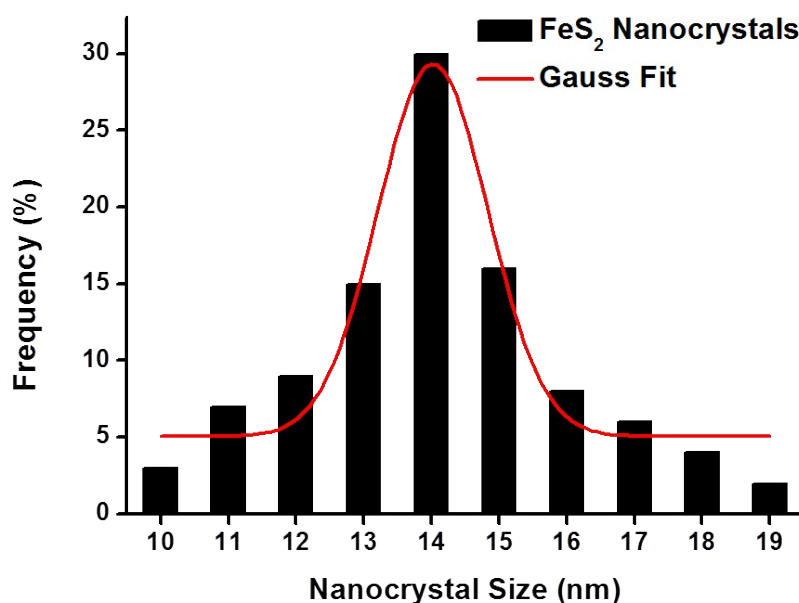

**Figure S1.** Histogram of size distribution of FeS<sub>2</sub> and Gaussian fitting.

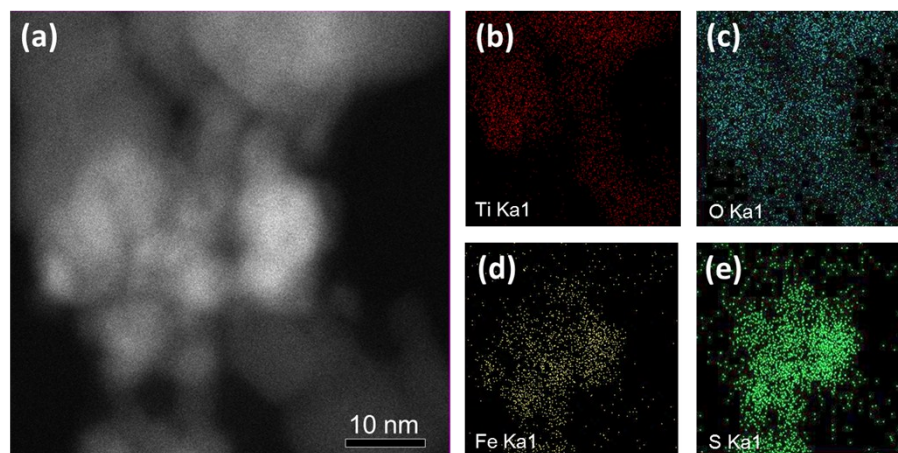

**Figure S2.** (a) HAADF-STEM images of FeS<sub>2</sub>-TiO<sub>2</sub> heterostructures and their selected EDS mapping of (b) Ti, (c) O, (d) Fe, and (e) S. As shown in Figure S2, the elements of Ti, O, Fe and S can be clearly observed in the FeS<sub>2</sub>-TiO<sub>2</sub> heterostructure, which results further suggested the successful conjugation of FeS<sub>2</sub> NCs and TiO<sub>2</sub> NPs to form the FeS<sub>2</sub>-TiO<sub>2</sub> heterostructures

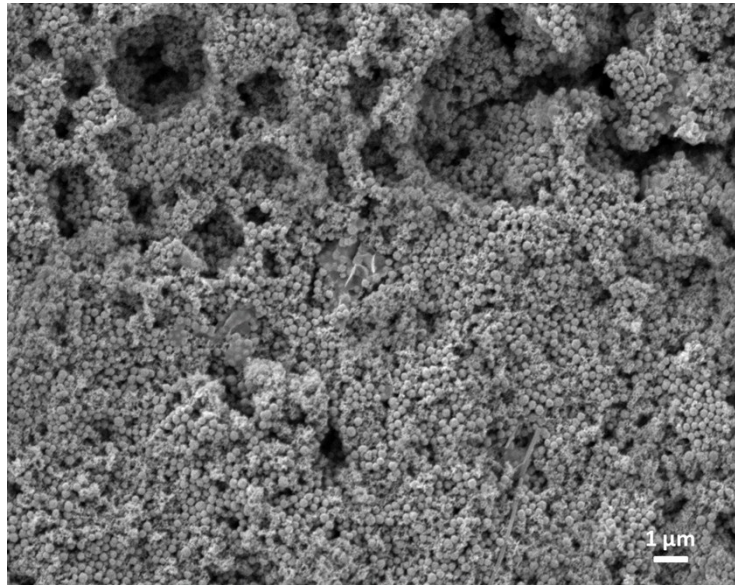

**Figure S3.** SEM image of FeS<sub>2</sub>-TiO<sub>2</sub> heterostructures.

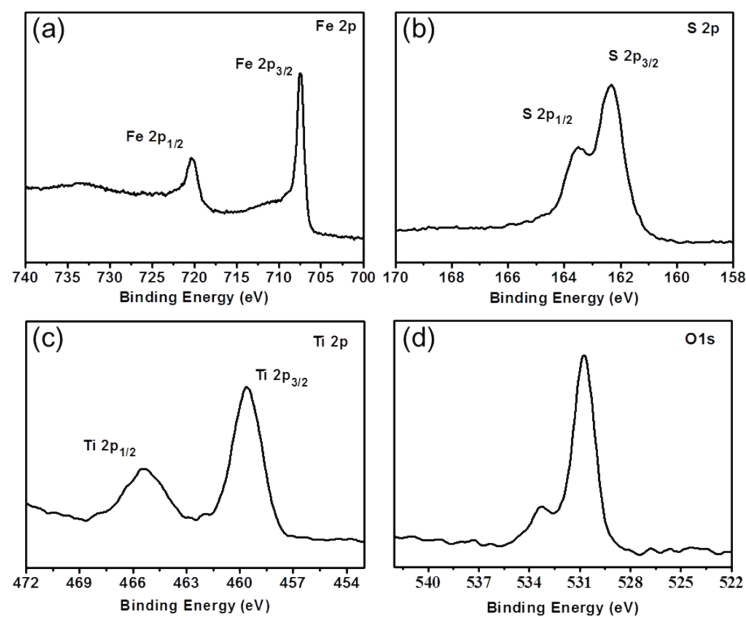

**Figure S4.** X-ray photoemission spectra of FeS<sub>2</sub>-TiO<sub>2</sub> heterostructures. (a) In the XPS Fe(2p) spectra, characteristic peaks of Fe(2p<sub>1/2</sub>) and Fe(2p<sub>3/2</sub>) were respectively detected at binding energies of 707.5 and 720.3 eV due to Fe<sup>2+</sup> of FeS<sub>2</sub> structure. (b) The binding energies of S(2p<sub>1/2</sub>) at 163.5 eV and S(2p<sub>3/2</sub>) at 162.3 eV were attributed to S<sub>2</sub><sup>2-</sup> of FeS<sub>2</sub>, indicating that a pyrite structure of FeS<sub>2</sub> was formed in FeS<sub>2</sub>-TiO<sub>2</sub> heterostructures. (c) The XPS spectra of Ti (2p<sub>1/2</sub>) at binding energy 465.4 eV and Ti

( $2p_{3/2}$ ) at binding energy 459.6 eV revealed  $Ti^{4+}$  of  $TiO_2$  in  $FeS_2$ - $TiO_2$  heterostructures.

(d) For the XPS spectra of O(1s), the main peak at 530.8 eV was ascribed to lattice oxygen in  $TiO_2$ , while the binding energy at 533.3 eV could be associated to surface hydroxyl groups.

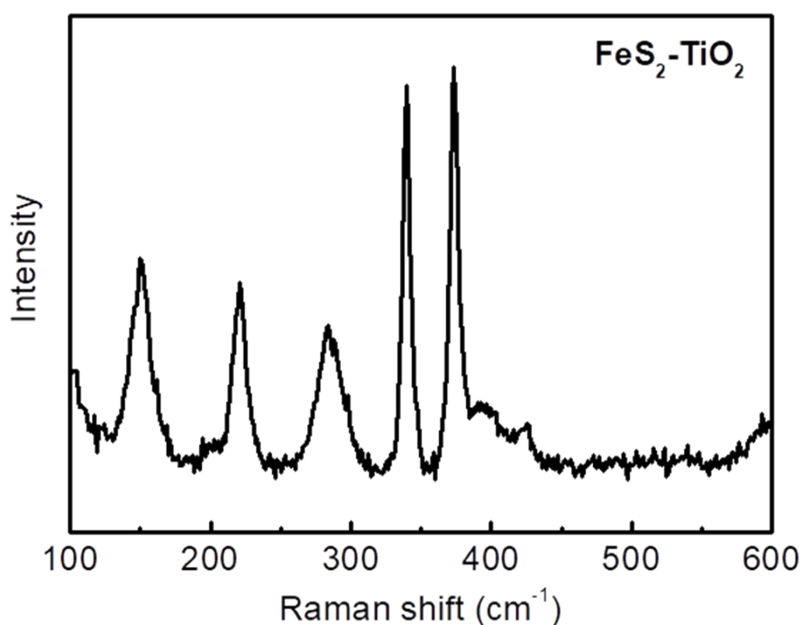

**Figure S5.** Raman spectra of  $FeS_2$ - $TiO_2$  heterostructures. Raman spectroscopy was performed to probe the surface structure of  $FeS_2$ - $TiO_2$  heterostructures. The Raman spectrum showed three peaks at 343, 379, and 430  $cm^{-1}$ , which are the characteristic active modes for pyrite corresponding to the  $S_2$  vibration ( $E_g$ ), S-S in-phase stretch ( $A_g$ ), and coupled vibration and stretch ( $T_g$ ) modes, respectively. The peak at 150  $cm^{-1}$  is originated from P25  $TiO_2$ . Besides, there is a few FeS phase (presence of Raman peaks at 214 and 282  $cm^{-1}$ ) observed in the heterostructures. Some FeS phases in the  $FeS_2$  NCs could be caused by the sulfur deficiency on the surface of  $FeS_2$  NCs.

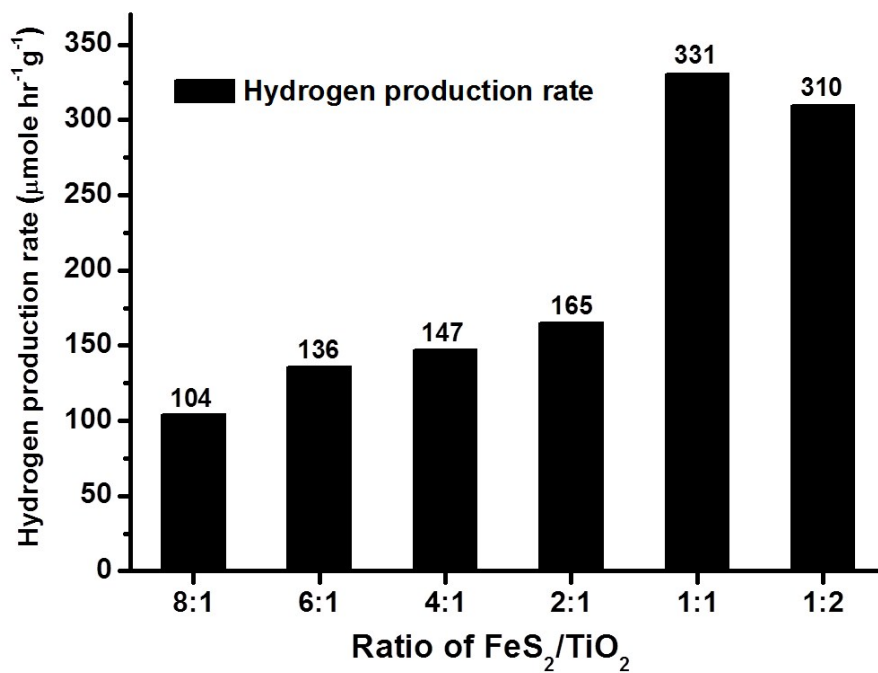

**Figure S6.** Hydrogen production rates of FeS<sub>2</sub>-TiO<sub>2</sub> heterostructures at different weight ratios of FeS<sub>2</sub> to TiO<sub>2</sub>.

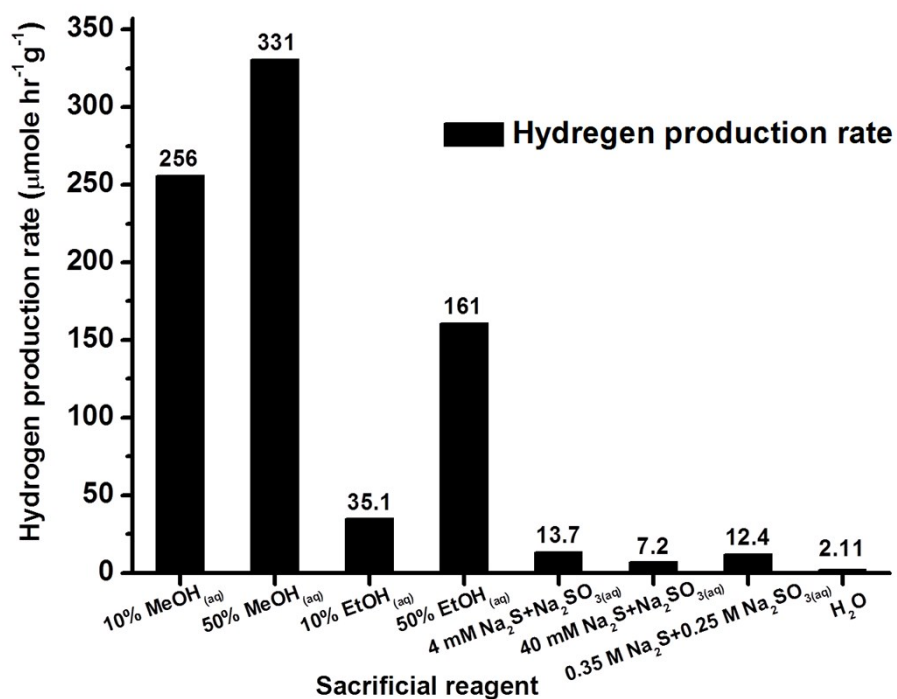

**Figure S7.** Hydrogen production rates of FeS<sub>2</sub>-TiO<sub>2</sub> heterostructures with different sacrificial reagents.

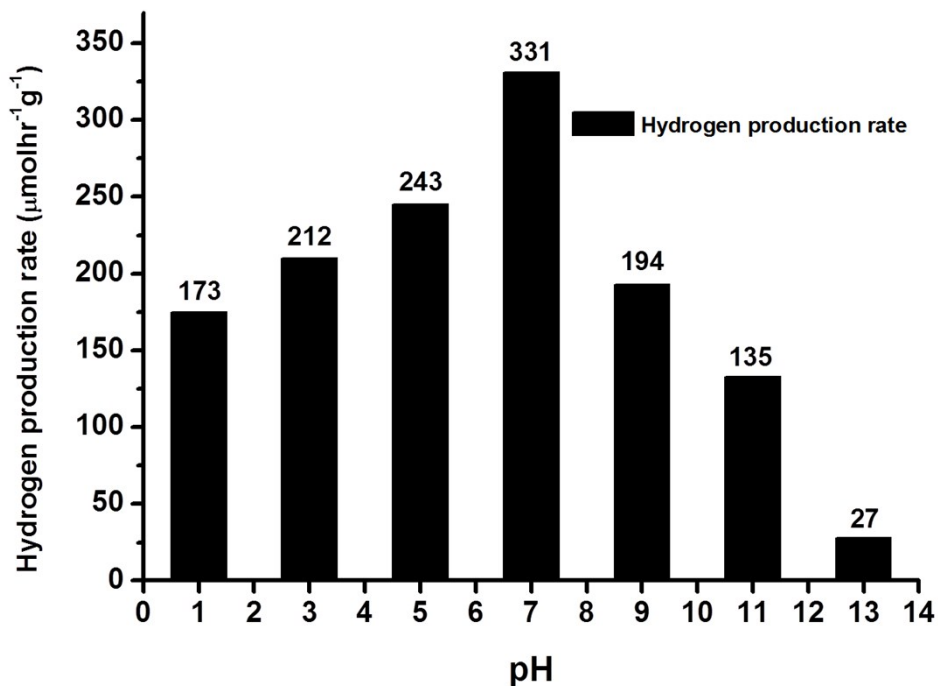

**Figure S8.** Photocatalytic hydrogen production rates of FeS<sub>2</sub>-TiO<sub>2</sub> heterostructures in different pH aqueous solution with 50% methanol as a sacrificial agent.

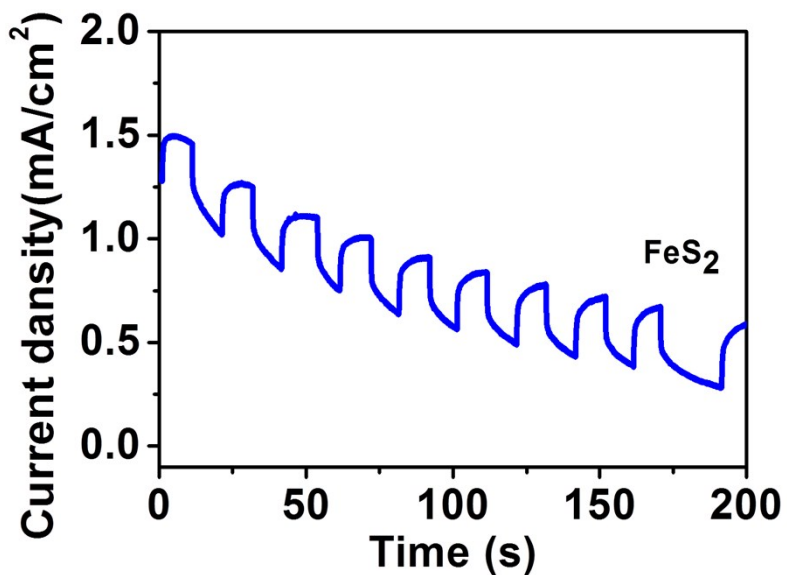

**Figure S9.** The current-time (*i-t*) characteristics of the pure FeS<sub>2</sub> under the on/off cycles of the NIR laser (808 nm) illumination at a constant bias of 0.1V. The materials was placed as on the FTO substrate as an anode electrode.
